# Supplementary material for: The glycolytic PKM gene is associated with immune infiltrates and therapeutic response of pancreatic cancer
Source: Research Square preprint supplement (doi:10.21203/rs.3.rs-7676660/v1), 2025-12-16
Supplement: Supplementary file 1 [file 12f31aa89f203a8b045d4204.xlsx]

## Sheet: Sheet1
93 common elements in "GSE28735" and "Glycolysis":
GALE
SLC2A1
DEPDC1
BPNT1
CDK1
CAPN5
PGM2L1
GAPDH
ACACB
EGLN3
ERO1A
B3GNT3
SDC1
TGFA
PYGB
AURKA
KDELR3
B4GALT4
GPR87
ADH1B
KIF20A
HMMR
CITED2
MET
VLDLR
TXN
GPC3
PLOD1
ENO1
PFKP
PFKFB3
HK1
P4HA1
B3GAT3
PPP2R1B
TPI1
SLC2A3
DCN
HIF1A
PYGL
PKM
SLC16A3
PLOD2
VCAN
TGFBI
GCLC
TPST1
IGFBP3
COL5A1
PGK1
AGRN
QSOX1
ELF3
SLC2A5
HKDC1
DDIT4
CD44
SLC5A12
GPD1
ALDH2
LDHB
PKP2
ALDH1A3
CHST4
ADORA2B
DSC2
ANGPTL4
PSMC4
GCKR
MERTK
PCK1
TFF3
MIF
SLC2A2
SRD5A3
ADH4
ADH1A
ADH1C
ADH7
PAM
HOMER1
STC2
VEGFA
IER3
ME1
RRAGD
EGFR
STC1
GFUS
GNE
FBP1
ALDOB
PFKFB1
