# Supplementary material for: The glycolytic PKM gene is associated with immune infiltrates and therapeutic response of pancreatic cancer
Source: Research Square preprint supplement (doi:10.21203/rs.3.rs-7676660/v1), 2025-12-16
Supplement: Supplementary file 2 [file 46456d2069dde308b79c3b0b.xlsx]

## Sheet: Sheet1
Category	Term	Count	%	PValue	Genes	List Total	Pop Hits	Pop Total	Fold Enrichment	Bonferroni	Benjamini	FDR
GOTERM_BP_DIRECT	GO:0006096~glycolytic process	8	17.391304347826086	2.3630966340244934E-11	PKM, PFKFB3, TPI1, HKDC1, ENO1, GAPDH, PFKM, HK1	46	51	19416	66.20971867007673	1.261894644333239E-8	1.2618936025690795E-8	1.2429888294968835E-8
GOTERM_BP_DIRECT	GO:0061621~canonical glycolysis	5	10.869565217391305	1.4637253309250543E-7	PKM, TPI1, ENO1, PFKM, HK1	46	21	19416	100.4968944099379	7.815988374981764E-5	3.908146633569895E-5	3.849597620332893E-5
GOTERM_BP_DIRECT	GO:0046835~carbohydrate phosphorylation	4	8.695652173913043	2.9139741129959235E-5	PFKFB3, HKDC1, PFKM, HK1	46	26	19416	64.93645484949833	0.015440404029851362	0.003890155440849558	0.0038318759585896393
GOTERM_BP_DIRECT	GO:0001666~response to hypoxia	6	13.043478260869565	5.557032131785398E-5	EGLN3, CITED2, SLC2A1, CXCR4, PLOD2, HIF1A	46	178	19416	14.227650219833903	0.02923938552471339	0.005934910316746805	0.005845997802638239
GOTERM_BP_DIRECT	GO:0005980~glycogen catabolic process	3	6.521739130434782	2.335872649840084E-4	PYGB, PYGL, PFKM	46	10	19416	126.62608695652173	0.11728259575462419	0.020789266583576747	0.020477816896931404
GOTERM_BP_DIRECT	GO:0006006~glucose metabolic process	4	8.695652173913043	4.595879254911088E-4	HKDC1, GAPDH, PGM2L1, HK1	46	65	19416	25.97458193979933	0.21766822641997863	0.03505999317317887	0.03453474982976046
Category	Term	Count	%	PValue	Genes	List Total	Pop Hits	Pop Total	Fold Enrichment	Bonferroni	Benjamini	FDR
GOTERM_CC_DIRECT	GO:0070062~extracellular exosome	16	34.78260869565217	4.688813430058735E-5	PYGB, TPI1, SLC2A1, CXCR4, PLOD2, SLC2A3, GLRX, ENO1, PYGL, TXN, PKM, CAPN5, CDK1, SDC1, TGFBI, GAPDH	46	2242	20666	3.2061435829810336	0.006496409959244387	0.006517450667781642	0.006329898130579293
GOTERM_CC_DIRECT	GO:0005829~cytosol	24	52.17391304347826	4.896232338054712E-4	EGLN3, PFKFB3, TPI1, CITED2, SLC2A1, GLRX, ENO1, PYGL, HMMR, TXN, ACACB, HIF1A, PGM2L1, AURKA, HK1, GCLC, GALE, PKM, HKDC1, CDK1, BPNT1, GAPDH, PFKM, NUP37	46	5576	20666	1.9336909737383818	0.06580893588262815	0.034028814749480246	0.03304956828186931
GOTERM_CC_DIRECT	GO:0062023~collagen-containing extracellular matrix	6	13.043478260869565	0.0015501260477133582	VCAN, PKM, COL5A1, PLOD2, TGFBI, DCN	46	391	20666	6.894028688980318	0.19397030467787235	0.056811041688395535	0.05517619156786617
GOTERM_CC_DIRECT	GO:0005796~Golgi lumen	4	8.695652173913043	0.001634850120529368	ERO1A, VCAN, SDC1, DCN	46	107	20666	16.794798862251117	0.20342191918199326	0.056811041688395535	0.05517619156786617
GOTERM_CC_DIRECT	GO:0009986~cell surface	7	15.217391304347828	0.0030376103842446123	CAPN5, CXCR4, SDC1, TGFA, ENO1, HMMR, MET	46	665	20666	4.729061784897025	0.3448364807930949	0.08444556868200022	0.08201548037460453
GOTERM_CC_DIRECT	GO:0005576~extracellular region	12	26.08695652173913	0.007553831102217623	PYGB, VCAN, PKM, COL5A1, IGFBP3, TGFA, TGFBI, PYGL, TXN, MET, DCN, B4GALT4	46	2248	20666	2.398189695187993	0.6514481582931791	0.16942831138644998	0.16455267652640826
Category	Term	Count	%	PValue	Genes	List Total	Pop Hits	Pop Total	Fold Enrichment	Bonferroni	Benjamini	FDR
GOTERM_MF_DIRECT	GO:0005536~D-glucose binding	4	8.695652173913043	5.360615730772273E-6	HKDC1, SLC2A3, PYGL, HK1	46	15	19208	111.35072463768115	0.0012375391688979054	0.001238302233808395	0.0012329416180776227
GOTERM_MF_DIRECT	GO:0005524~ATP binding	12	26.08695652173913	6.879532124462772E-4	GCLC, PKM, PFKFB3, HKDC1, CDK1, KIF20A, PYGL, ACACB, MET, PFKM, AURKA, HK1	46	1544	19208	3.245325523766614	0.14697965525080525	0.07945859603754502	0.07911461943132188
GOTERM_MF_DIRECT	GO:0140677~molecular function activator activity	3	6.521739130434782	0.0019515525507401762	CITED2, MET, AURKA	46	28	19208	44.73913043478261	0.36316781295400913	0.15026954640699355	0.1496190288900802
GOTERM_MF_DIRECT	GO:0031220~maltodextrin phosphorylase activity	2	4.3478260869565215	0.007012232848163125	PYGB, PYGL	46	3	19208	278.3768115942029	0.8031930098319209	0.3239651575851364	0.32256271101550377
GOTERM_MF_DIRECT	GO:0008184~glycogen phosphorylase activity	2	4.3478260869565215	0.007012232848163125	PYGB, PYGL	46	3	19208	278.3768115942029	0.8031930098319209	0.3239651575851364	0.32256271101550377
GOTERM_MF_DIRECT	GO:0008160~protein tyrosine phosphatase activator activity	2	4.3478260869565215	0.009338942013785705	VCAN, IGFBP3	46	4	19208	208.78260869565216	0.8855288203559288	0.3595492675307496	0.3579927771951187
Category	Term	Count	%	PValue	Genes	List Total	Pop Hits	Pop Total	Fold Enrichment	Bonferroni	Benjamini	FDR
KEGG_PATHWAY	hsa04066:HIF-1 signaling pathway	9	19.565217391304348	1.8075130596827068E-8	EGLN3, PFKFB3, HKDC1, SLC2A1, ENO1, HIF1A, GAPDH, PFKM, HK1	40	109	8865	18.299311926605505	2.0967129721327638E-6	1.1371038974819358E-6	1.0292750796172695E-6
KEGG_PATHWAY	hsa05230:Central carbon metabolism in cancer	8	17.391304347826086	1.9605239611757515E-8	PKM, HKDC1, SLC2A1, HIF1A, SLC16A3, MET, PFKM, HK1	40	71	8865	24.971830985915492	2.2742052361302E-6	1.1371038974819358E-6	1.0292750796172695E-6
KEGG_PATHWAY	hsa00010:Glycolysis / Gluconeogenesis	7	15.217391304347828	3.9799183037843383E-7	PKM, TPI1, HKDC1, ENO1, GAPDH, PFKM, HK1	40	67	8865	23.154850746268654	4.6165995828850726E-5	1.538901744129944E-5	1.3929714063245184E-5
KEGG_PATHWAY	hsa01200:Carbon metabolism	7	15.217391304347828	1.0113101083233624E-5	PKM, TPI1, HKDC1, ENO1, GAPDH, PFKM, HK1	40	116	8865	13.373922413793103	0.0011724378147314196	2.932799314137751E-4	2.654689034348826E-4
KEGG_PATHWAY	hsa00051:Fructose and mannose metabolism	5	10.869565217391305	1.3490036606312358E-5	PFKFB3, TPI1, HKDC1, PFKM, HK1	40	34	8865	32.591911764705884	0.0015636310544701049	3.129688492664467E-4	2.8329076873255955E-4
KEGG_PATHWAY	hsa01100:Metabolic pathways	19	41.30434782608695	3.601849048992319E-5	PYGB, PFKFB3, TPI1, PLOD2, ENO1, PYGL, ACACB, PGM2L1, HK1, GCLC, GALE, PKM, HKDC1, B3GNT3, GPAT3, BPNT1, GAPDH, PFKM, B4GALT4	40	1564	8865	2.692375319693095	0.0041695035263003	5.968778424044416E-4	5.402773573488479E-4
