# Supplementary material for: The glycolytic PKM gene is associated with immune infiltrates and therapeutic response of pancreatic cancer
Source: Research Square preprint supplement (doi:10.21203/rs.3.rs-7676660/v1), 2025-12-16
Supplement: Supplementary file 3 [file 54e2f2db0f8304cb57d6db7a.xlsx]

## Sheet: Sheet1
glycolysis-related genes
HK1
KHK
LCT
MPI
PGM1
PYGL
PYGM
TPI1
TREH
GAPDH
GPI
ALDOA
ALDOB
ALDOC
FBP1
FBP2
IFNG
PFKL
PFKM
PFKP
ACACB
EMB
SLC16A1
SLC16A3
SLC16A7
SLC16A8
SLC5A12
SLC5A8
ABCB6
ADORA2B
AGL
AGRN
AK3
AK4
AKR1A1
ALDH7A1
ALDH9A1
ALG1
ANG
ANGPTL4
ANKZF1
ARPP19
ARTN
AURKA
B3GALT6
B3GAT1
B3GAT3
B3GNT3
B4GALT1
B4GALT2
B4GALT4
B4GALT7
BIK
BPNT1
CACNA1H
CAPN5
CASP6
CD44
CDK1
CENPA
CHPF
CHPF2
CHST1
CHST12
CHST2
CHST4
CHST6
CITED2
CLDN3
CLDN9
CLN6
COG2
COL5A1
COPB2
CTH
CXCR4
CYB5A
DCN
DDIT4
DEPDC1
DLD
DPYSL4
DSC2
ECD
EFNA3
EGFR
EGLN3
ELF3
ENO1
ENO2
ERO1A
EXT1
EXT2
FAM162A
FKBP4
FUT8
G6PD
GAL3ST1
GALE
GALK1
GALK2
GAPDHS
GCLC
GFPT1
GFUS
GLCE
GLRX
GMPPA
GMPPB
GNE
GNPDA1
GOT1
GOT2
GPC1
GPC3
GPC4
GPR87
GUSB
GYS1
GYS2
HAX1
HDLBP
HK2
HMMR
HOMER1
HS2ST1
HS6ST2
HSPA5
IDH1
IDUA
IER3
IGFBP3
IL13RA1
IRS2
ISG20
KDELR3
KIF20A
KIF2A
LDHA
LDHC
LHPP
LHX9
MDH1
MDH2
ME1
ME2
MED24
MERTK
MET
MIF
MIOX
MXI1
NANP
NASP
NDST3
NDUFV3
NOL3
NSDHL
NT5E
P4HA1
P4HA2
PAM
PAXIP1
PC
PDK3
PFKFB1
PGAM1
PGAM2
PGK1
PGLS
PGM2
PHKA2
PKM
PKP2
PLOD1
PLOD2
PMM2
POLR3K
PPFIA4
PPIA
PPP2CB
PRPS1
PSMC4
PYGB
QSOX1
RARS1
RBCK1
RPE
RRAGD
SAP30
SDC1
SDC2
SDC3
SDHC
SLC25A10
SLC25A13
SLC35A3
SLC37A4
SOD1
SOX9
SPAG4
SRD5A3
STC1
STC2
STMN1
TALDO1
TFF3
TGFA
TGFBI
TKTL1
TPBG
TPST1
TXN
UGP2
VCAN
VEGFA
VLDLR
XYLT2
ZNF292
ACSS1
ACSS2
ADH1A
ADH1B
ADH1C
ADH4
ADH5
ADH6
ADH7
ALDH1A3
ALDH1B1
ALDH2
ALDH3A1
ALDH3A2
ALDH3B1
ALDH3B2
BPGM
DLAT
ENO3
G6PC1
G6PC2
GALM
GCK
HK3
LDHAL6A
LDHAL6B
LDHB
PCK1
PCK2
PDHA1
PDHA2
PDHB
PGAM4
PGK2
PKLR
ACO1
ACO2
FH
IDH2
IDH3B
IDH3G
SDHA
SDHB
SDHD
SUCLG1
AAAS
ADPGK
ENO4
GCKR
GNPDA2
HKDC1
NDC1
NUP107
NUP133
NUP153
NUP155
NUP160
NUP188
NUP205
NUP210
NUP214
NUP35
NUP37
NUP42
NUP43
NUP50
NUP54
NUP58
NUP62
NUP85
NUP88
NUP93
NUP98
PFKFB2
PFKFB3
PFKFB4
PGM2L1
PGP
POM121
POM121C
PPP2CA
PPP2R1A
PPP2R1B
PPP2R5D
PRKACA
PRKACB
PRKACG
RAE1
RANBP2
SEC13
SEH1L
TPR
SLC2A1
GPT
MPC1
MPC2
SLC2A2
SLC2A3
SLC2A4
SLC2A5
PRKAA1
RB1
TP53
GPAT3
GPD1
HIF1A
PPARG
