# Supplementary material for: The glycolytic PKM gene is associated with immune infiltrates and therapeutic response of pancreatic cancer
Source: Research Square preprint supplement (doi:10.21203/rs.3.rs-7676660/v1), 2025-12-16
Supplement: Supplementary file 4 [file 56fa0635fde9d1f80ad836ac.xlsx]

## Sheet: Sheet1
46 common elements in "GSE62452" and "Glycolysis":
GALE
SLC2A1
NDC1
BPNT1
CDK1
HKDC1
CAPN5
PGM2L1
GAPDH
TPI1
ACACB
NUP37
EGLN3
ERO1A
PKM
SLC16A3
B3GNT3
SDC1
TGFA
PYGB
AURKA
B4GALT4
GPR87
KIF20A
HMMR
CITED2
MET
TXN
ENO1
PFKFB3
HK1
PFKM
SLC2A3
DCN
HIF1A
PYGL
CXCR4
PLOD2
GPAT3
VCAN
TGFBI
GLRX
GCLC
TPST1
IGFBP3
COL5A1
