# Supplementary material for: The glycolytic PKM gene is associated with immune infiltrates and therapeutic response of pancreatic cancer
Source: Research Square preprint supplement (doi:10.21203/rs.3.rs-7676660/v1), 2025-12-16
Supplement: Supplementary file 5 [file 5f2a72a1e5564f3bb2c4f340.xlsx]

## Sheet: Sheet1
GSE28735 positively correlated with pancreatic cancer
PADI1
SFN
SERINC2
HDAC1
MFSD2A
CDC20
KIF2C
TSPAN1
NFIA
EPHX4
GPSM2
TENT5C
PIAS3
EFNA1
NUF2
FIRRM
LAMC2
INAVA
CTSE
DTL
CENPF
KCNK1
EXO1
EPHA2
GALE
RHBDL2
SNORA55
SLC2A1
ELOVL1
STIL
LRP8
DEPDC1
TGFBR3
FRRS1
SLC25A24
PSMA5
EPS8L3
H2BC21
H2AC21
MTMR11
S100A10
S100A6
S100A2
S100A14
IQGAP3
NECTIN4
DPT
ANGPTL1
ASPM
KIF14
UBE2T
LEMD1
C1orf116
LAMB3
NEK2
BPNT1
CHML
NET1
MCM10
PDSS1
MASTL
DKK1
CDK1
MCU
KIF20B
KIF11
CEP55
HELLS
CYP2C18
CYP2C19
CYP2C9
CXCL12
RTKN2
DNA2
USP54
ANKRD22
COL17A1
MKI67
HTATIP2
PRRG4
KIAA1549L
CAT
CD82
FAM111B
DTX4
PLCB3
MYEOV
CAPN5
SIK2
ZBTB16
TMPRSS4
OAF
CHEK1
TMEM45B
CYB5R2
USH1C
KIF18A
PLAAT2
CTSF
PGM2L1
PAK1
MMP13
SLC35F2
EXPH5
IL18
MPZL2
USP2
TRIM29
B4GALNT3
CCND2
RAD51AP1
CD9
NCAPD2
GAPDH
PDE3A
BMAL2
TUBA1C
TMT1A
KRT7
ACACB
KNTC1
TMEM132C
FOXM1
STYK1
KRAS
CAPRIN2
SINHCAF
DENND5B
AMIGO2
RACGAP1
PPP1R1A
PTPRR
E2F7
FGD6
CIT
OASL
RHOF
WASF3
BRCA2
CKAP2
KLF5
LMO7
SCEL
GJB2
SKA3
PARP4
CENPJ
GUCY1B2
DIAPH3
EFNB2
KLHDC1
CDKN3
LGALS3
GALNT16
TTC9
GSKIP
VRK1
MEG3
NDRG2
EGLN3
MIS18BP1
POLE2
ERO1A
WDHD1
DLGAP5
GPX2
PLEK2
FBLN5
AHNAK2
SNORD116-1
SNORD116-14
SNORD116-15
SNORD116-24
ARHGAP11B
ARHGAP11A
KNL1
NUSAP1
HMGN2P46
SQOR
SEMA6D
CCNB2
GCNT3
ZWILCH
KIF23
PSMA4
ABHD17C
ADAMTSL3
FANCI
TICRR
BLM
FMN1
LPCAT4
FRMD5
ADAM10
ANXA2
PCLAF
SEMA7A
PRC1
MSLN
TMC7
TMC5
PLK1
ORC6
LPCAT2
CDH3
CENPN
BCO1
GAN
ATP2C2
FOXL1
ARL6IP1
ERN2
SHCBP1
NETO2
DOK4
NQO1
FA2H
MEAK7
ZDHHC7
FANCA
ATP1B2
ATAD5
ERBB2
RAPGEFL1
CDC6
ITGA3
PRR11
KPNA2
ITGB4
TRIM16
SPAG5
SLFN13
GSDMB
TOP2A
TNS4
KRT19
KRT14
KRT16
KRT17
JUP
BRCA1
HOXB5
HOXB6
BRIP1
ABCA10
JPT1
ST6GALNAC1
TYMS
NDC80
GREB1L
SNRPD1
RIOK3
LAMA3
MOCOS
SETBP1
PMAIP1
SERPINB5
TMEM241
DHFR
SERPINB3
MISP
CIRBP
SNRPG
CYP4F12
B3GNT3
CCNE1
FXYD3
CYP2S1
CEACAM5
CEACAM6
CBLC
TRPM4
MYH14
EPS8L1
PTPRS
FUT3
JUND
RHPN2
CEACAM1
CEACAM8
KCNN4
RASIP1
PTPRH
ASAP2
GRHL1
RRM2
GEN1
MSH2
SANBR
SNORD94
NCAPH
SLC9A2
TMEM87B
IL1RN
GPD2
GALNT5
CERS6
CDCA7
SPATS2L
BZW1
ZDBF2
SGPP2
ACSL3
CCL20
ATG16L1
MLPH
MBOAT2
SDC1
XDH
XPO1
TGFA
CAPG
MALL
BUB1
CKAP2L
IL1A
ITGB6
FIGN
IKZF2
BARD1
ABCA12
AP1S3
IRS1
PYGB
GINS1
TPX2
FAM83D
PI3
WFDC2
DNTTIP1
UBE2C
SLCO4A1
SLC4A11
FERMT1
CST3
BCL2L1
FER1L4
SLPI
PLTP
SALL4
BCAS1
AURKA
PMEPA1
PPP4R1L
PTK6
SIM2
B3GALT5
SLC37A1
TMPRSS3
CSTB
CDC45
SEC14L2
KDELR3
CELSR1
FANCD2
IRAK2
KAT2B
VILL
TRAK1
KIF15
PARP3
FLNB
PLXNA1
CLDN18
SMC4
PRKCI
ECT2
RTP4
IL1RAP
SGO1
CDCP1
ALS2CL
MST1R
FAM107A
CD47
CIP2A
B4GALT4
CD80
POLQ
ADCY5
MUC13
RUVBL1
CP
GPR87
TRIM59
TNIK
NCEH1
LIPH
IGF2BP2
RFC4
MUC4
S100P
AFAP1-AS1
NCAPG
SHROOM3
ARHGAP24
PLK4
MSMO1
ANXA10
NEIL3
HS3ST1
FGFBP1
OCIAD2
NMU
UBA6
CXCL5
ADH1B
H2AZ1
CENPE
ELOVL6
MAD2L1
CCNA2
INPP4B
ANXA2P1
HMGB2
CENPU
FAT1
TRIP13
ITGA2
CCNB1
XRCC4
RASA1
LMNB1
KIF20A
PTTG1
HMMR
SPDL1
GABRP
SFXN1
CDHR2
LIFR
SELENOP
C5orf34
DEPDC1B
CENPK
CDO1
CCDC69
MGAT4B
FOXQ1
H2AC6
H2BC5
H2BC6
H2BC7
H2AC8
H2BC9
H2BC10
H2AC11
H3C10
H2BC14
HLA-V
TRIM15
MUCL3
HCP5
TMEM63B
SLC25A27
FAM83B
TTK
CENPW
ABRACL
ADGRG6
PPP1R14C
ACAT2
TFAP2A
H3C2
H2AC4
H1-2
H2BC4
H1-3
H2BC11
H2BC12
H2AC14
H1-5
H3C11
TRIM31
SFTA2
ADGRF1
TNFRSF21
MCM3
CGAS
FAM184A
MAN1A1
PERP
CITED2
SYNE1
EZR
SNORD13P2
C1GALT1
AQP1
ANLN
RALA
CLDN4
CLDN12
MUC17
PRKAR2B
TES
MET
STRIP2
ADAP1
AGMO
AGR2
AGR3
IGF2BP3
DPY19L1
PON2
PDK4
BAIAP2L1
SMURF1
KPNA7
PLOD3
AASS
EZH2
NCAPG2
DOCK5
CDCA2
ESCO2
POLB
MCM4
MTBP
FAM83A
FAM91A1
SQLE
CLU
PBK
KIF13B
FGFR1
SDR16C5
GGH
CCNE2
YWHAZ
ATAD2
GSDMC
CYRIB
MROH6
FAM83H
VLDLR
ANXA2P2
CA9
MELK
NTRK2
CKS2
SMC2
OLFM1
NFIB
FREM1
MIR31HG
ALDH1A1
GOLM1
CTSV
CORO2A
TXN
PTBP3
TSPAN7
KIF4A
CENPI
TCEAL2
VSIG1
SLC6A14
ZNF185
GPC3
MTND1P23
SPSB1
PGD
PLOD1
PDPN
CLIC4
PLK3
MAST2
HOOK1
SGIP1
IL12RB2
ST6GALNAC5
CTTNBP2NL
PTGFRN
C1orf54
ECM1
ATP8B2
SYT11
KIRREL1
PEA15
FCGR2A
DDR2
PRRX1
SUCO
RASAL2
MR1
LAMC1
HMCN1
ODR4
NAV1
HSD11B1
CAPN2
KIF26B
ENO1
MFAP2
CAPZB
HSPG2
LUZP1
ID3
SLC9A1
PTAFR
SNHG12
FABP3
SYNC
P3H1
SYDE2
GBP3
COL11A1
SLC16A4
CD58
CTSK
S100A16
TPM3
THBS3
FCGR3A
OLFML2B
TNFSF4
RNASEL
RGS16
UCHL5
KCNT2
FMOD
PTPN14
NID1
OPN3
PFKP
PFKFB3
ECHDC3
VIM
PLXDC2
MAP3K8
ZEB1
CSGALNACT2
PRKG1
ARID5B
HK1
UNC5B
PLAU
ENTPD1
WBP1L
PLPP4
HTRA1
ACADSB
CDNF
SVIL
VSTM4
P4HA1
ACTA2
MYOF
SH3PXD2A
CHST15
ADAM12
OLFML1
AMPD3
MICAL2
SPON1
FIBIN
RCN1
PRR5L
TSPAN18
FADS2
FERMT3
ANO1
CTTN
ARHGEF17
SERPINH1
PANX1
ARHGAP42
LAYN
NNMT
TAGLN
UBASH3B
ST3GAL4
APLP2
NTM
JAM3
IFITM10
IRAG1
ARHGAP1
TMEM258
B3GAT3
CFL1
EFEMP2
CD248
CHKA
ARAP1
P4HA3
LRRC32
NOX4
MMP12
POGLUT3
ARHGAP20
PPP2R1B
THY1
BLID
CLMP
FEZ1
ETS1
CACNA1C
TSPAN9
TPI1
C1S
CLSTN3
STK38L
PPFIBP1
CCDC91
CACNB3
HSD17B6
LRP1
GLI1
MSRB3
YEATS4
NAV3
RLIG1
PLXNC1
DRAM1
CHST11
TRAFD1
OAS2
TNFRSF1A
C1R
SLC2A3
MFAP5
KIF21A
PRICKLE1
VDR
FMNL3
MAP3K12
ITGA5
STAT2
OSBPL8
PPFIA2
LUM
DCN
GLT8D2
NUAK1
TMEM119
CORO1C
SSH1
KCTD10
ANKLE2
ALOX5AP
DGKH
GPC6
ITGBL1
COL4A2
POSTN
EPSTI1
ENOX1
KLF12
POGLUT2
COL4A1
RASA3
PNP
MMP14
COCH
ATL1
FRMD6
DACT1
HIF1A
SUSD6
FLVCR2
TNFAIP2
SLC7A7
PRKD1
SEC23A
RPL36AL
MAP4K5
PYGL
NID2
ARMH4
ACTN1
LTBP2
TGFB3
DIO2
GREM1
SPRED1
THBS1
STARD9
SLC27A2
MINDY2
LOXL1
ISLR
CEMIP
IL16
IQGAP1
SLCO3A1
ATP10A
FBN1
ATOSA
NEDD4
MYO1E
DENND4A
ITGA11
UACA
PKM
HEXA
STRA6
PEAK1
TBC1D2B
MFGE8
FAM174B
CHSY1
ABCC1
IL4R
MVP
STX4
ADCY7
MMP2
CMTM3
NUDT7
CRISPLD2
XYLT1
CDH11
COG4
PIEZO1
ZFP3
KCTD11
AP2B1
FKBP10
GRN
ITGB3
TOM1L1
MRC2
TANC2
CD300A
RNF213
NPB
SLC16A3
ABR
MYH10
GAS7
PMP22
RAB34
MYO1D
SLFN12
PLXDC1
CAVIN1
COPZ2
COL1A1
TOB1
SLC16A6
CDC42EP4
TIMP2
LGALS3BP
EIF4A3
TWSG1
RAB31
FHOD3
SCARNA17
ZNF532
SERPINB8
CCDC102B
COLEC12
MYOM1
PIEZO2
ZNF521
CDH2
SMAD7
TCF4
ALPK2
CNN2
ICAM1
MYO9B
COLGALT1
ZNF181
ACTN4
AXL
APOE
EMP3
FTL
RCN3
PLIN3
PODNL1
NOTCH3
COMP
TSHZ3
PLAUR
SLC6A16
SNTG2
TRIB2
FOSL2
LBH
LTBP1
PLEKHH2
CAMKMT
ANTXR1
MXD1
DYSF
TMSB10
MAP4K4
LIMS1
SLC20A1
GLI2
PLEKHB2
KYNU
TNFAIP6
NOSTRIN
CYBRD1
ITGAV
FAM171B
COL3A1
FZD7
NRP2
ADAM23
SLC11A1
ARMC9
COPS8
SNED1
PXDN
MATN3
EFEMP1
REEP1
SEMA4C
LONRF2
RNF149
RFX8
ST6GAL2
ACVR1
PLA2R1
FAP
COL5A2
FZD5
FN1
IGFBP5
ARL4C
COL6A3
LAMP5
ISM1
SLC24A3
RIN2
MYL9
DHX35
PLCG1
SGK2
TSHZ2
DOK5
CPXM1
RNF24
CST1
CST2
TGM2
SULF2
PTGIS
B4GALT5
CTSZ
LKAAEAR1
NCAM2
ITSN1
ETS2
COL6A1
COL6A2
RUNX1
PTTG1IP
MMP11
TIMP3
APOL1
LGALS1
GALR3
APOBEC3C
GGT5
LIF
PIK3IP1
MYH9
JOSD1
NAGA
BHLHE40
LMCD1
FBLN2
TMEM43
SLC6A6
UBE2E2
RBMS3
CMTM8
CRTAP
FBXL2
ITGA9
CTNNB1
GNAI2
MITF
GXYLT2
COL8A1
ARHGAP31
ATP1B3
SERPINI1
SKIL
YEATS2
LPP
SH3BP5
RFTN1
SLC4A7
TRANK1
LAMB2
UBA7
NT5DC2
PRICKLE2
PDZRN3
ROBO1
CBLB
CCDC80
MYLK
ITGB5
PLXND1
PLOD2
LXN
RARRES1
GOLIM4
GNB4
ABCC5
LRRC15
HTRA3
BST1
PCDH7
PDGFRA
PARM1
SEPTIN11
ALPK1
EDNRA
TDO2
ETFDH
PALLD
TENM3
SPON2
AFAP1
WDR1
APBB2
ATP8A1
CORIN
IGFBP7
CENPC
UNC5C
LEF1
ANKRD50
PCDH18
NR3C2
SFRP2
GASK1B
NPY1R
DDX60L
RWDD4
PDLIM3
ADCY2
TRIO
BASP1
CDH6
RAI14
OSMR
PTGER4
GPX8
MAP1B
NSA2
JMY
CMYA5
RASGRF2
VCAN
CAST
EPB41L4A-AS1
CHSY3
TGFBI
CTNNA1
ARHGAP26
SGCD
ANKH
ADAMTS12
PRLR
ESM1
ADAMTS6
EDIL3
NUDT12
NREP
MCC
LOX
SAR1B
SPOCK1
STING1
HBEGF
SPRY4
DPYSL3
PDGFRB
ANXA6
SPARC
STK10
SH3PXD2B
DBN1
PDLIM7
ADAMTS2
GFPT2
E2F3
BTN2A2
BTN3A3
TUBB
C2
PTK7
RUNX2
MEP1A
PRDM1
DSE
CALHM5
DCBLD1
GJA1
TMEM200A
UST
MTHFD1L
FNDC1
NEDD9
DDAH2
CLIC1
PSMB8
TRAM2
ELOVL5
GCLC
DST
RAB23
COL12A1
FYN
LAMA4
COL10A1
MOXD1
MAP7
AGPAT4
PDE10A
THBS2
FAM20C
TTYH3
TSPAN13
GPNMB
SUGCT
AEBP1
ADCY1
UPP1
TPST1
PTPN12
ADAM22
COL1A2
ARPC1B
CNPY4
PCOLCE
DNAJB9
KCND2
HILPDA
CALU
CALD1
ZYX
MPLKIP
TMEM176A
CYTH3
ETV1
GSDME
OSBPL3
NOD1
NT5C3A
MATCAP2
SFRP4
INHBA
GLI3
IGFBP3
HIP1
SEMA3C
SAMD9L
PON3
LAMB1
WNT2
DGKI
TMEM176B
ARHGEF10
BMP1
ADAM28
DPYSL2
ADGRA2
ADAM9
RRS1
SULF1
CRISPLD1
ZFHX4
ZC2HC1A
CTHRC1
ZFPM2
CCN4
DENND3
LY6E
CTSB
LOXL2
MSC
JPH1
ZFAND1
MMP16
RUNX1T1
GEM
LRP12
TRPS1
FBXO32
PLEC
KANK1
NPR2
CTSL
MFSD14B
TGFBR1
SLC44A1
PALM2AKAP2
GSN
PTGS1
CERCAM
SPTAN1
LRRC8A
ABL1
COL5A1
MPDZ
TTC39B
BNC2
SLC24A2
HACD4
TPM2
TLN1
CEMIP2
CARNMT1
ROR2
ASPN
ECM2
TBC1D2
ABCA1
PTPN3
SUSD1
TNFSF15
TNC
ANGPTL2
EGFL6
PPEF1
SAT1
XK
TIMP1
MSN
HEPH
PGK1
SRPX2
NRK
PLS3
BGN
MXRA5
ANOS1
ACOT9
ZXDA
ACSL4
FLNA
F8
SEPTIN7P13
LINC01128
AGRN
PER3
RBP7
ANGPTL7
RNU5E-1
CDA
ALPL
EPHB2
HMGN2
PTPRU
DNALI1
BMP8A
CTPS1
PTPRF
SNORD38B
UQCRH
CYP4B1
CYP4X1
STRADB
PODN
PRKAA2
PATJ
ATG4C
ROR1
RAVER2
NEXN
DNAJB4
IFI44L
IFI44
CCN1
CLCA2
CLCA1
CLCA4
LRRC8B
FNBP1L
ABCD3
SNX7
PLPPR4
VCAM1
GSTM1
GSTM5
OLFML3
SLC22A15
TXNIP
RNVU1-19
CGN
TUFT1
CRCT1
SPRR1A
SPRR3
SPRR1B
S100A9
NPR1
AQP10
RAB25
LMNA
SEMA4A
SLC25A44
CD1A
CD1E
FCER1A
APCS
ATP1A2
HSPA6
UAP1
RGS4
BLZF1
FMO3
FMO2
RALGPS2
SOAT1
QSOX1
C1orf21
PLA2G4A
RGS13
RGS2
ELF3
PRELP
MFSD4A
PM20D1-AS1
C4BPB
C4BPA
LOC148696
G0S2
ATF3
FLVCR1
KCNK2
SPATA17
TGFB2
LYPLAL1
MTARC1
FAM177B
GJC2
RHOU
GALNT2
CAPN9
SCCPDH
MXRA8
UTS2
ERRFI1
SLC2A5
DHRS3
PADI2
IFFO2
CAMK2N1
HTR1D
IFI6
RNU5D-1
ZSWIM5
PDZK1IP1
RAB3B
DHCR24
PLPP3
TACSTD2
JUN
CYP2J2
ITGB3BP
WLS
PTGER3
NEGR1
SLC44A5
SSX2IP
DDAH1
ZNHIT6
ODF2L
HFM1
GCLM
ARHGAP29
F3
SORT1
GSTM3
LRIF1
KCND3
BCL2L15
DENND2C
AMPD1
TSPAN2
CASQ2
SPAG17
HMGCS2
REG4
PRKAB2
FMO5
ACP6
SV2A
GOLPH3L
MINDY1
SELENBP1
SPRR2A
S100A12
S100A4
MUC1
SNORA80E
CRABP2
ETV3
CRP
ITLN1
CFAP126
CCDC190
RGS5
GPA33
SLC19A2
F5
SELE
TNFSF18
SNORD78
ABL2
NMNAT2
COLGALT2
IVNS1ABP
PTGS2
B3GALT2
DENND1B
LAD1
CSRP1
LMOD1
CHI3L1
CHIT1
PPP1R15B
PIK3C2B
NUAK2
SLC26A9
PIGR
IRF6
SLC30A10
DUSP10
TLR5
SUSD4
ENAH
TMEM63A
CDC42BPA
AGT
AKT3
ZNF124
AKR1E2
AKR1C3
ITIH2
KIAA1217
THNSL1
HSD17B7P2
ZNF487
MSMB
UBE2D1
BICC1
HKDC1
TSPAN15
DDIT4
LRMDA
NRG3
SNCG
LIPN
IFIT2
IFIT3
IFIT1
HECTD2
EXOC6
PLCE1
ZNF518A
ENTPD7
ABCC2
SEMA4G
GSTO1
ADRA2A
PLEKHS1
TDRD1
SLC18A2
BAG3
DMBT1
FANK1
KLF6
AKR1C2
PRKCQ
ITIH5
CCDC3
HACD1
NEBL
ACBD5
DEPP1
PTPN20
IPMK
ANK3
EGR2
TACR2
PPA1
KCNMA1
ZCCHC24
ANKRD1
RBP4
SORBS1
BLNK
PIK3AP1
LOXL4
KCNIP2
GPAM
DCLRE1A
AFAP1L2
GFRA1
HSPA12A
CLRN3
ADAM8
PKP3
LMNTD2-AS1
PNPLA2
CD151
MUC5B
KRTAP5-AS1
SYT8
TNNI2
IGF2
OR52N4
ZNF215
WEE1
ADM
PDE3B
NCR3LG1
SAA1
ZDHHC13
BBOX1
EHF
CD44
FJX1
C11orf96
CREB3L1
RTN4RL2
MS4A2
MS4A8
MS4A10
MYRF
SAC3D1
CST6
CCND1
MOGAT2
DGAT2
ACER3
AQP11
THRSP
PIWIL4
DYNC2H1
ZC3H12C
CFAP68
BCO2
LOC100132686
NCAM1
RBM7
APOC3
SORL1
GRAMD1B
BARX2
ST14
ADAMTS15
IFITM3
CDHR5
DUSP8
KRTAP5-3
CTSD
HBB
HBD
OR52N5
OR2D2
SCUBE2
LYVE1
PLEKHA7
TPH1
SAA2
FANCF
SVIP
SLC5A12
WT1
CSTF3
ELF5
PAMR1
SYT13
C1QTNF4
GLYAT
TCN1
FADS3
SNORD30
PLAAT3
ZFTA
FOSL1
MRGPRF
PDE2A
C2CD3
KCNE3
CHRDL2
XRRA1
ARRB1
MIR326
WNT11
FAM181B
RAB30
RAB38
CHORDC1
MMP7
MMP10
MMP1
MMP3
GUCY1A2
SLN
RDX
CRYAB
CADM1
APOA4
MCAM
MIR125B1
SNORD14E
SNORD14C
ARHGAP32
LOC399975
IGSF9B
TIGAR
SCARNA10
DSTNP2
LINC00965
RIMKLB
A2ML1
KLRD1
APOLD1
EMP1
MGST1
PIK3C2G
CAPZA3
PLEKHA5
SLCO1B3
SLCO1B1
PYROXD1
IRAG2
ETFRF1
REP15
LRRK2
CNTN1
PDZRN4
SPATS2
AQP5
GPD1
SCN8A
NR4A1
KRT18
IGFBP6
MIR148B
TMT1B
ERBB3
SHMT2
HMGA2
MYRFL
LGR5
ACSS3
NTS
SOCS2
ACTR6
NR1H4
MYBPC1
C12orf75
ALDH2
OAS1
OAS3
HSPB8
PIWIL1
ADGRD1
LINC02370
ZNF10
CRACR2A
ANO2
VWF
SCNN1A
LPCAT3
APOBEC1
SLC2A14
CLEC4E
KLRC4-KLRK1
KLRC3
YBX3
TAS2R13
TAS2R50
TAS2R20
TAS2R31
TAS2R46
TAS2R43
MANSC1
LINC01559
PLBD1
GUCY2C
ART4
RERG
RERGL
LDHB
SOX5
BHLHE41
ITPR2
PTHLH
PKP2
ZCRB1
SLC38A1
SNORA2B
RND1
TUBA1A
GALNT6
KRT81
KRT6B
KRT6A
KRT5
KRT8
SNORD59B
MYO1A
LRIG3
AVPR1A
DPY19L2
C12orf56
CPM
TSPAN8
PHLDA1
RASSF9
KITLG
DUSP6
EPYC
TMCC3
HAL
SLC41A2
CRY1
TESC
RNU4-2
RNU4-1
HNF1A-AS1
HCAR2
HCAR3
HCAR1
TNFRSF19
LSP1
PABPC3
RASL11A
SERTM1
RGCC
DNAJC15
LACC1
SETDB2
OLFM4
PCDH17
FARP1
ATP11A
GAS6
GJB6
SHISA2
SLC46A3
HSPH1
TRPC4
LHFPL6
TPT1
SLC25A30
HTR2A
CAB39L
DLEU2
MIR15A
ATP7B
PCDH9
EDNRB
SPRY2
SLITRK6
SLC15A1
NALCN
GRTP1
DHRS2
AKAP6
DPPA3P2
MIPOL1
MIA2
PTGER2
SAMD4A
SNAPC1
SMOC1
RGS6
RIOX1
FOS
PPP4R4
BDKRB1
EML1
MIR127
SNORD113-3
SNORD113-4
SNORD114-2
SNORD114-3
SNORD114-6
SNORD114-26
MIR134
MIR154
SNORA28
CRIP2
TMEM121
FAM30A
RPPH1
AJUBA
DHRS1
GZMB
NOVA1
ARHGAP5-AS1
BAZ1A
NFKBIA
RALGAPA1
MBIP
FERMT2
BMP4
GCH1
ADAM20P1
ENTPD5
SERPINA1
WARS1
PWAR6
SNORD116-2
SNORD116-6
SNORD116-23
SNORD116-29
APBA2
LINC02915
CHST14
GCHFR
SPINT1
SORD
DUOXA2
SLC28A2
GLDN
MAPK6
TEX9
TPM1
APH1B
PAQR5
THSD4
DNAJA4
CHRNA5
ABHD2
ARRDC4
SYNM
ALDH1A3
ACTC1
DPH6
PPIP5K1
DUOX2
WDR72
MNS1
ALDH1A2
RPS27L
LINC00597
CTSH
ST20
NTRK3
DET1
PLIN1
PRKXP1
ZG16B
TNFRSF12A
IL32
ATF7IP2
SYT17
CCP110
ANKS4B
HS3ST2
SCNN1G
ZNF267
CAPNS2
MT2A
CETP
ADGRG1
ADGRG3
CES2
CALB2
CHST4
HP
HSD17B2
RPL13
SSTR5-AS1
SNORD60
PPL
C16orf89
GRIN2A
EMP2
SOCS1
PLA2G10
MYH11
LYRM2
LOC105371114
GPRC5B
DCUN1D3
PRSS8
TOX3
RPGRIP1L
IRX3
CES1
PLLP
RRAD
MLKL
CHST5
ADAMTS18
SDR42E1
LINC00917
SLC7A5
SLC22A31
TRARG1
SERPINF1
ASPA
TM4SF5
BCL6B
KDM6B
TMEM88
CYB5D1
GLP2R
MYOCD
ADORA2B
SNORD49A
USP32P1
LGALS9
SLC13A2
CCL2
CCL8
CCL13
CCL4
C17orf78
ARHGAP23
IGFBP4
KRT10-AS1
AOC3
IFI35
RPS26
EFCAB13
NGFR
ACSF2
ABCC3
GDPD1
MIR21
PITPNC1
MAP2K6
LLGL2
SPHK1
ATP2A3
CXCL16
ZNF594
CLDN7
PER1
CENPV
RASD1
GRAP
LYRM9
SLC46A1
CCL3
KRT20
KRT23
KRT13
KRT15
CCR10
PPY
GJC1
C1QL1
PRR15L
GIP
ANKRD40CL
RNF43
SEPTIN4
RNFT1
ABCA8
CD300E
ST6GALNAC2
USP36
FASN
MGC70870
MYL12A
DLGAP1-AS1
ARHGAP28
APCDD1
GNAL
CIDEA
CYP4F35P
RBBP8
DSG3
DSG2
MEP1B
GALNT1
SLC14A1
LIPG
RAB27B
ONECUT2
GRP
TNFRSF11A
SERPINB13
SERPINB7
SERPINB2
NFATC1
ADGRA3
ESCO1
ABHD3
ANKRD29
DSC3
DSC2
TRAPPC8
MYO5B
CCDC68
RNF152
PIGN
[truncated: 1,017 more rows]
