# Supplementary material for: The glycolytic PKM gene is associated with immune infiltrates and therapeutic response of pancreatic cancer
Source: Research Square preprint supplement (doi:10.21203/rs.3.rs-7676660/v1), 2025-12-16
Supplement: Supplementary file 6 [file 691a019e56de67e7145d4821.xlsx]

## Sheet: Sheet1
GSE62452 positively correlated with pancreatic cancer
PADI1
SFN
SERINC2
HDAC1
CDC20
KIF2C
TSPAN1
CDC7
EPHX4
GPSM2
PIAS3
TUFT1
NUF2
BLZF1
FIRRM
LAMC2
INAVA
CTSE
DTL
CENPF
BROX
CAPN9
KCNK1
EXO1
EPHA2
CAMK2N1
GALE
RHBDL2
SLC2A1
STIL
LRP8
NDC1
FRRS1
SLC25A24
PSMA5
EPS8L3
H2BC21
H2AC21
MTMR11
S100A6
S100A16
S100A14
IQGAP3
NECTIN4
ANGPTL1
ASPM
KIF14
UBE2T
LEMD1
C1orf116
LAMB3
NEK2
BPNT1
TAF1A
CDC42BPA
CHML
ADSS2
NET1
PDSS1
MASTL
DKK1
CDK1
HKDC1
TSPAN15
MCU
KIF20B
KIF11
CEP55
HELLS
CYP2C18
CYP2C19
CYP2C9
CXCL12
RTKN2
DNA2
ANKRD22
COL17A1
MKI67
ADAM8
HTATIP2
PRRG4
KIAA1549L
CD82
FAM111B
PLCB3
MYEOV
ANO1
CAPN5
SIK2
ZBTB16
TMPRSS4
CHEK1
TMEM45B
USH1C
KIF18A
TCN1
PLAAT2
PGM2L1
PAK1
MMP7
MMP12
SLC35F2
EXPH5
IL18
MPZL2
USP2
TRIM29
B4GALNT3
CCND2
RAD51AP1
CD9
NCAPD2
GAPDH
TPI1
PDE3A
BMAL2
SPATS2
TMT1A
KRT7
ACACB
OAS1
OAS3
KNTC1
GTF2H3
FOXM1
SCNN1A
STYK1
LINC01559
KRAS
CAPRIN2
SINHCAF
AMIGO2
RACGAP1
KRT6A
PPP1R1A
PTPRR
TSPAN8
E2F7
FGD6
NUP37
CIT
OASL
RHOF
BRCA2
CKAP2
KLF5
LMO7
SCEL
GJB2
SKA3
CENPJ
DIAPH3
EFNB2
CDKN3
LGALS3
PSMA3
IFI27
GSKIP
VRK1
EGLN3
ERO1A
WDHD1
DLGAP5
GPX2
PLEK2
AHNAK2
ARHGAP11B
ARHGAP11A
KNL1
NUSAP1
HMGN2P46
SQOR
SEMA6D
CCNB2
GCNT3
ZWILCH
KIF23
PSMA4
ABHD17C
CEMIP
ADAMTSL3
FANCI
TICRR
BLM
LPCAT4
FRMD5
ADAM10
ANXA2
PCLAF
DENND4A
PKM
STRA6
SEMA7A
PRC1
MSLN
TMC7
TMC5
PLK1
ORC6
CDH3
CYB5B
CENPN
GAN
ATP2C2
FOXL1
ARL6IP1
KNOP1
ERN2
SHCBP1
NETO2
DOK4
NQO1
ZDHHC7
ATAD5
ERBB2
RAPGEFL1
CDC6
ITGA3
PRR11
ITGB4
SLC16A3
TRIM16
SPAG5
SLFN13
GSDMB
TOP2A
TNS4
KRT19
KRT14
KRT16
KRT17
JUP
BRCA1
HOXB5
HOXB6
BRIP1
JPT1
ST6GALNAC1
TYMS
NDC80
GREB1L
SNRPD1
RIOK3
LAMA3
MOCOS
SETBP1
SERPINB5
ABHD3
TMEM241
DHFR
SERPINB3
MISP
CIRBP
SNRPG
CYP4F12
B3GNT3
CCNE1
FXYD3
CYP2S1
CEACAM5
CEACAM6
CBLC
IGFL2
MYH14
PTPRS
FUT3
MUC16
JUND
RHPN2
CEACAM1
KCNN4
PTPRH
SNTG2
ASAP2
GRHL1
RRM2
VSNL1
GEN1
MSH2
PROM2
NCAPH
SLC9A2
TMEM87B
IL1RN
GPD2
GALNT5
PSMD14
CERS6
DHRS9
ITGA6
CDCA7
SPATS2L
SGPP2
CCL20
MLPH
MBOAT2
SDC1
XDH
XPO1
TGFA
CAPG
LONRF2
MALL
BUB1
IL1A
ITGB6
WDR12
IKZF2
BARD1
ABCA12
AP1S3
IRS1
MSL3B
PYGB
GINS1
TPX2
FAM83D
PI3
WFDC2
DNTTIP1
UBE2C
PFDN4
SLC4A11
FERMT1
CST1
CST2
BCL2L1
FER1L4
SLPI
BCAS1
AURKA
PMEPA1
PPP4R1L
PTK6
SIM2
B3GALT5
SLC37A1
TFF2
TFF1
TMPRSS3
CSTB
SEC14L2
CELSR1
PLXNB2
LRRN1
FANCD2
KAT2B
VILL
FLNB
ATXN7
CLDN18
PLS1
SMC4
PRKCI
ECT2
RTP4
CDCP1
ALS2CL
MST1R
WNT5A
FAM107A
DCBLD2
CD47
CIP2A
B4GALT4
CD80
POLQ
MUC13
RUVBL1
CP
GPR87
TRIM59
PDCD10
TNIK
LIPH
IGF2BP2
RFC4
MUC4
S100P
AFAP1-AS1
NCAPG
SHROOM3
ARHGAP24
PLK4
MSMO1
ANXA10
NEIL3
FGFBP1
OCIAD2
NMU
UBA6
CXCL5
CENPE
ELOVL6
MAD2L1
CCNA2
ANXA2P1
PDGFC
CENPU
FAT1
TRIP13
ITGA2
CCNB1
CDK7
XRCC4
RASA1
LMNB1
KIF20A
PTTG1
HMMR
SPDL1
GABRP
SFXN1
LIFR
HMGCS1
ESM1
DEPDC1B
CENPK
CCDC69
FOXQ1
ID4
H2AC6
H2BC5
H2BC7
H2BC10
H3C10
H2BC14
MUCL3
ITPR3
TMEM63B
FAM83B
TTK
CENPW
ABRACL
ADGRG6
ACAT2
TFAP2A
H3C2
H2AC4
H1-2
H2BC4
H2BC11
H2AC14
H1-5
H3C11
TRIM31
PPP1R10
SFTA2
ADGRF1
TNFRSF21
CGAS
FAM184A
PERP
CITED2
EZR
SNORD13P2
C1GALT1
AQP1
ANLN
RALA
CLDN4
CLDN12
PRKAR2B
MET
STRIP2
CARD11
AGR2
AGR3
IGF2BP3
DPY19L1
PON2
BAIAP2L1
SMURF1
KPNA7
NCAPG2
DOCK5
CDCA2
ESCO2
POLB
MCM4
OXR1
MAL2
MTBP
FAM83A
FER1L6
SQLE
MYC
CLU
PBK
KIF13B
FGFR1
SDR16C5
GGH
ATAD2
GSDMC
CYRIB
FAM83H
CHMP5
ANXA2P2
MELK
NTRK2
CKS2
SMC2
LCN2
LRRC8A
NFIB
FREM1
MIR31HG
GOLM1
CTSV
CORO2A
TBC1D2
TXN
TSPAN7
KIF4A
CENPI
TCEAL2
VSIG1
SLC6A14
ZNF185
POF1B
H4C15
H4C14
PGD
TNFRSF1B
PDPN
C1QA
C1QC
C1QB
CLIC4
MAN1C1
CD52
THEMIS2
SMAP2
PLK3
MAST2
PODN
PDE4B
SGIP1
GADD45A
NEXN
IFI44
CDC14A
EEIG2
CD53
C1orf162
CD2
PTGFRN
PFN1P2
C1orf54
ECM1
ATP8B2
SYT11
KIRREL1
CD1C
MNDA
PYHIN1
IFI16
PEA15
SLAMF7
FCER1G
FCGR2A
FCGR2B
DDR2
RCSD1
PRRX1
FMO1
RASAL2
NPL
LAMC1
RGL1
HMCN1
PRG4
ODR4
RGS18
RGS1
CFH
CFHR1
CFHR2
PTPRC
CAMSAP2
NAV1
PRELP
ATP2B4
LAX1
SRGAP2
CR2
CR1
HSD11B1
TRAF3IP3
MARK1
CAPN2
CNIH3
GPR137B
KMO
KIF26B
NLRP3
ENO1
MFAP2
CAPZB
HSPG2
LUZP1
ID3
SLC9A1
SNHG12
LAPTM5
FABP3
RNF19B
PPT1
P3H1
ELOVL1
ADGRL4
MCOLN2
SYDE2
GBP3
GBP5
CNN3
RPL7
DPYD
COL11A1
VAV3
SLC16A4
KCNA3
PTPN22
NOTCH2
GJA5
CTSS
CTSK
CDC42SE1
RFX5
S100A10
THBS3
FCRL5
FCRL2
FCRL1
SLAMF6
CD84
CD48
ADAMTS4
FCGR3A
OLFML2B
SELP
SELL
TNFSF4
NCF2
KCNT2
CSRP1
FMOD
FCMR
CD34
PTPN14
LYST
NID1
CEP170
AKT3
PFKFB3
CELF2
VIM
MRC1
PLXDC2
APBB1IP
MAP3K8
ZEB1
CREM
CSGALNACT2
WDFY4
PRKG1
ARID5B
SRGN
HK1
PLAU
VCL
FAS
ENTPD1
PI4K2A
WBP1L
GRK5
PLPP4
HTRA1
PTPRE
SFMBT2
ITGA8
PIP4K2A
ARHGAP21
SVIL
ITGB1
NRP1
NAMPT
VSTM4
FAM13C
JMJD1C
PRF1
ACTA2
MYOF
NT5C2
RGS10
CHST15
ADAM12
IFITM2
TRIM22
OLFML1
AMPD3
MICAL2
SPON1
FIBIN
RCN1
PRR5L
TSPAN18
SERPING1
MS4A4A
MS4A1
CD5
FADS2
PLAAT4
FERMT3
CTTN
FOLR2
SLCO2B1
SERPINH1
PANX1
LAYN
NNMT
TAGLN
IL10RA
CD3E
CD3G
UBASH3B
SLC37A2
ST3GAL4
FLI1
APLP2
NTM
JAM3
IFITM3
DUSP8
IFITM10
TPP1
GVINP1
IRAG1
ARHGAP1
LPXN
MPEG1
MS4A6A
SLC15A3
TMEM258
RASGRP2
CFL1
EFEMP2
CD248
ARAP1
FCHSD2
UCP2
P4HA3
LRRC32
DLG2
CTSC
NOX4
SESN3
TRPC6
CASP1
CARD16
POGLUT3
ARHGAP20
JAML
CD3D
THY1
BLID
CLMP
ETS1
CACNA1C
TSPAN9
CD4
C1S
CLSTN3
CLEC4A
KLRG1
CLEC2D
ETV6
EMP1
SSPN
STK38L
PPFIBP1
BICD1
PFKM
CACNB3
TUBA1C
TAMALIN
NCKAP1L
PDE1B
MYL6
RBMS2
HSD17B6
LRP1
MSRB3
GLIPR1
NAV3
TMTC3
PLXNC1
ELK3
APAF1
DRAM1
CHST11
ATP2A2
VWF
TNFRSF1A
C1R
CD163L1
CD163
SLC2A3
C3AR1
MFAP5
A2M
KLRB1
CD69
CLEC1A
CLEC7A
MGP
ARHGDIB
ABCC9
TMTC1
ABCD2
PRICKLE1
NELL2
VDR
TUBA1A
FMNL3
BIN2
MAP3K12
ITGA5
TESPA1
STAT2
GNS
OSBPL8
PPP1R12A
PPFIA2
ATP2B1
LUM
DCN
CDK17
BLTP3B
IGF1
GLT8D2
NUAK1
CMKLR1
TMEM119
CORO1C
SSH1
KCTD10
RILPL2
ANKLE2
ALOX5AP
LACC1
GPC6
ITGBL1
TNFSF13B
COL4A2
SACS
PARP4
KATNAL1
DCLK1
SPART
POSTN
LHFPL6
EPSTI1
LCP1
RUBCNL
KLF12
KCTD12
GPR183
NALCN
POGLUT2
COL4A1
RASA3
PNP
RNASE6
MMP14
COCH
ATL1
FRMD6
GNG2
DACT1
PRKCH
HIF1A
RHOJ
PCNX1
SNORD56B
GPR65
TNFAIP2
SLC7A7
PRKD1
SEC23A
MAP4K5
NIN
PYGL
NID2
FERMT2
ARMH4
TMEM30B
ACTN1
LTBP2
TGFB3
CEP128
LGMN
GPR132
IGHA1
GREM1
SPRED1
THBS1
STARD9
FGF7
TMOD2
AQP9
MINDY2
RAB8B
LOXL1
PML
ISLR
IL16
TM6SF1
IQGAP1
SLCO3A1
LOC102724971
ATP10A
FMN1
SLC12A6
RASGRP1
PLCB2
ZNF106
FBN1
ATP8B4
DMXL2
MYO5A
MYO1E
ITGA11
UACA
MYO9A
HEXA
PEAK1
TBC1D2B
BCL2A1
MFGE8
CIITA
ABCC1
PRKCB
IL4R
SPN
MVP
CORO1A
ITGAL
ITGAM
ITGAX
MMP2
LPCAT2
CDH5
CMTM3
SLC7A6
CMIP
PLCG2
CRISPLD2
IRF8
IGSF6
XPO6
SEZ6L2
RPGRIP1L
CDH11
ESRP2
PIEZO1
SERPINF1
CD68
ADAP2
AP2B1
GRB7
FKBP10
IFI35
GRN
ITGB3
SCPEP1
MRC2
TANC2
MILR1
CD300A
RNF213
ABR
CXCL16
SCIMP
CLEC10A
RPL26
MYH10
GAS7
PMP22
RAB34
SSH2
CRLF3
EVI2B
MYO1D
SLFN11
SLFN12
SLFN12L
CCL5
PLXDC1
IKZF3
CCR7
CAVIN1
VAT1
COL1A1
TOB1
MMD
SEPTIN4
PECAM1
GNA13
SLC16A6
FAM20A
ABCA9
ABCA6
ABCA10
CYTH1
TIMP2
LGALS3BP
EIF4A3
TWSG1
RAB31
SCARNA17
ZNF532
CCDC102B
EPB41L3
PIEZO2
ZNF521
PSTPIP2
TCF4
ALPK2
BCL2
CD226
CNN2
VAV1
ICAM1
MYO9B
COLGALT1
IFI30
LSR
CD22
HCST
ACTN4
AXL
EMP3
FTL
CD37
RCN3
FPR3
LILRB4
C3
MYO1F
ICAM3
PODNL1
ADGRE2
NOTCH3
COMP
DMKN
TYROBP
GMFG
TGFB1
PLAUR
FUT1
KLK11
FPR1
LAIR1
TRIB2
FOSL2
LBH
LTBP1
RASGRP3
PLEKHH2
SPTBN1
REL
PLEK
ARHGAP25
ANTXR1
TMSB10
IGKC
MAP4K4
IL1R1
IL1RL1
IL18R1
IL18RAP
LIMS1
SLC20A1
PLEKHB2
ARHGAP15
TNFAIP6
FMNL2
CYBRD1
ITGA4
ITGAV
FAM171B
COL3A1
NABP1
FZD7
CD28
CTLA4
ICOS
NRP2
ADAM23
ARPC2
SLC11A1
SP140
SP100
ARMC9
INPP5D
COPS8
SNED1
PXDN
ITGB1BP1
CYRIA
MATN3
ADCY3
NLRC4
PRKD3
CYP1B1
SLC8A1
CCDC88A
EFEMP1
PELI1
REEP1
SEMA4C
AFF3
RNF149
ST6GAL2
CXCR4
ZEB2
CYTIP
ACVR1
PLA2R1
FAP
WIPF1
PDE1A
CALCRL
COL5A2
STAT4
STK17B
HECW2
ANKRD44
KLF7
FN1
IGFBP5
SERPINE2
DOCK10
SP110
ARL4C
COL6A3
LAMP5
ISM1
RIN2
HCK
MYL9
PLCG1
STK4
CTSA
PARD6B
TSHZ2
DOK5
CPXM1
RASSF2
GPCPD1
FOXA2
CD93
SAMHD1
TGM2
SULF2
PREX1
ZNFX1
PTGIS
B4GALT5
CTSZ
MIR99AHG
NCAM2
JAM2
IFNAR2
ITSN1
ETS2
COL6A1
COL6A2
SAMSN1
ADAMTS1
TIAM1
RUNX1
ERG
PTTG1IP
ITGB2
S100B
DGCR5
MMP11
TIMP3
NCF4
CYTH4
LGALS1
PARVG
FBLN1
ADA2
PI4KA
GGT5
LIF
PIK3IP1
MYH9
JOSD1
NAGA
ITPR1
BHLHE40
LMCD1
LINC00312
ATG7
FBLN2
TMEM43
SLC6A6
UBE2E2
RBMS3
TGFBR2
CCR4
CRTAP
FBXL2
ITGA9
CTNNB1
CCR2
GNAI2
STAB1
MITF
GXYLT2
ARL13B
COL8A1
NXPE3
TRAT1
CD96
CD200
BOC
TIGIT
ARHGAP31
CD86
PARP15
PLXNA1
ATP1B3
TRPC1
LOC100287290
MFSD1
SKIL
B3GNT5
ST6GAL1
LPP
IL1RAP
SH3BP5
RFTN1
ZNF385D
SLC4A7
TRANK1
CCR1
LAMB2
UBA7
NT5DC2
SELENOK
PRICKLE2
ADAMTS9
FRMD4B
PDZRN3
ROBO1
VGLL3
PROS1
ABI3BP
CBLB
BTLA
CCDC80
CD200R1
LSAMP
HCLS1
PARP9
MYLK
ITGB5
PLXND1
SLC9A9
PLOD2
PLSCR4
PLSCR1
GPR171
P2RY14
LXN
RARRES1
GOLIM4
GNB4
KLHL6
ABCC5
ATP13A3
HTRA3
BST1
CD38
SLIT2
PCDH7
DTHD1
RHOH
ATP10D
PDGFRA
KIT
STAP1
SEPTIN11
CXCL13
BMP2K
GPAT3
BANK1
NFKB1
MCUB
ENPEP
ALPK1
ANK2
SYNPO2
FAT4
EDNRA
ARHGAP10
TLR2
TDO2
PALLD
TENM3
SPON2
AFAP1
WDR1
LDB2
TLR10
TLR1
TLR6
TMEM156
APBB2
ATP8A1
CORIN
TXK
SGCB
CHIC2
IGFBP7
JCHAIN
NAAA
RASGEF1B
SPARCL1
SNCA
HPGDS
EMCN
PPP3CA
LEF1
CFI
CAMK2D
ANKRD50
PCDH18
RNF150
SH3D19
SFRP2
GASK1B
MARCHF1
ACSL1
PDLIM3
TRIO
BASP1
CDH6
RAI14
IL7R
SLC1A3
OSMR
PARP8
GZMK
GZMA
GPX8
GAPT
PIK3R1
MAP1B
FCHO2
F2R
RASGRF2
VCAN
CAST
CAMK4
TGFBI
ARHGAP26
SGCD
ITK
CYFIP2
DOCK2
ANKH
MYO10
ADAMTS12
FYB1
DAB2
ANXA2R
ARL15
IL6ST
ADAMTS6
CD180
NAIP
EDIL3
MEF2C
ARRDC3
MCTP1
GLRX
ST8SIA4
MCC
LOX
PPIC
SPOCK1
STING1
CD14
DPYSL3
CSF1R
PDGFRB
CD74
ANXA6
SPARC
HAVCR2
ADAM19
EBF1
LCP2
STK10
SH3PXD2B
DBN1
PDLIM7
ADAMTS2
GFPT2
IRF4
LY86
JARID2
TRIM38
BTN3A2
BTN3A1
BTN3A3
TUBB
C2
KCTD20
PTK7
RUNX2
MEP1A
CD109
FHL5
PRDM1
DSE
CALHM5
DCBLD1
GJA1
LAMA2
TMEM200A
PDE7B
TNFAIP3
STX11
SASH1
PLEKHG1
MYCT1
SYTL3
FNDC1
CCR6
PXDC1
F13A1
NEDD9
RIPOR2
CMAHP
DDAH2
HLA-DOB
PSMB8
HLA-DMB
HLA-DMA
HLA-DOA
HLA-DPA1
PLA2G7
ADGRF5
TRAM2
ELOVL5
GCLC
DST
RAB23
COL12A1
FILIP1
FYN
LAMA4
COL10A1
THEMIS
SAMD3
EPB41L2
MOXD1
STX7
VNN2
IPCEF1
TAGAP
AGPAT4
PDE10A
THBS2
FAM20C
TTYH3
GLCCI1
TSPAN13
GPNMB
GPR141
AEBP1
IKZF1
TPST1
ADAM22
COL1A2
ARPC1B
CNPY4
PCOLCE
SERPINE1
PIK3CG
TES
KCND2
CPED1
CALU
CALD1
TBXAS1
ZYX
GIMAP7
GIMAP4
GIMAP2
TMEM176A
ACTB
THSD7A
ETV1
HYCC1
GSDME
OSBPL3
CPVL
FKBP14
NOD1
AOAH
ELMO1
SFRP4
INHBA
GLI3
MYO1G
IGFBP3
DDC
HIP1
FGL2
SEMA3C
HGF
CACNA2D1
SEMA3D
PDK4
ASNS
LAMB1
DOCK4
TFEC
WNT2
ZC3HAV1
TPK1
TMEM176B
ARHGEF10
BMP1
ADAMDEC1
DPYSL2
ADGRA2
PLEKHA2
ADAM9
LYN
PREX2
SULF1
CRISPLD1
ZFHX4
ZC2HC1A
CIBAR1
ESRP1
GRHL2
CTHRC1
ZFPM2
CCN4
DENND3
LY6E
CTSB
DLC1
MSR1
LOXL2
EBF2
RNF122
SNAI2
MMP16
RUNX1T1
GEM
LRP12
TRPS1
ENPP2
FBXO32
TATDN1
ASAP1
TMEM71
SLA
PLEC
DOCK8
JAK2
IL33
TEK
DNAJB5
RECK
GLIPR2
ANXA1
PCSK5
TLE4
CTSL
MFSD14B
TGFBR1
SLC44A1
ZNF462
PALM2AKAP2
UGCG
TLR4
CNTRL
GSN
PTGS1
CERCAM
SPTAN1
ABL1
COL5A1
MPDZ
TTC39B
BNC2
HACD4
CCL19
TPM2
TLN1
CEMIP2
ROR2
OMD
ASPN
ECM2
ABCA1
SVEP1
TNFSF8
TNC
STOM
GGTA1
ANGPTL2
ENG
FNBP1
FAM78A
CSF2RA
IL3RA
MSL3
TLR7
EGFL6
SAT1
XK
CYBB
GPR34
USP11
TIMP1
MSN
HEPH
P2RY10
GPR174
SRPX2
NRK
PLS3
DOCK11
SH2D1A
INTS6L
IDS
BGN
MXRA5
PNPLA4
ANOS1
MID1
SH3KBP1
RPS6KA3
ACOT9
TASL
DIPK2B
PIM2
VSIG4
CXorf65
CYSLTR1
ITM2A
NAP1L3
BTK
GLA
ACSL4
LRCH2
SEPTIN6
MAP7D3
ARHGEF6
ATP11C
FLNA
GAB3
CLIC2
HLA-DQB2
TARP
