# Supplementary material for: The glycolytic PKM gene is associated with immune infiltrates and therapeutic response of pancreatic cancer
Source: Research Square preprint supplement (doi:10.21203/rs.3.rs-7676660/v1), 2025-12-16
Supplement: Supplementary file 7 [file e3bc396628cdaa961ef9d452.xlsx]

## Sheet: Sheet1
Category	Term	Count	%	PValue	Genes	List Total	Pop Hits	Pop Total	Fold Enrichment	Bonferroni	Benjamini	FDR
GOTERM_BP_DIRECT	GO:0006096~glycolytic process	11	11.827956989247312	3.7548463427876736E-14	PFKFB1, PKM, PFKFB3, TPI1, HKDC1, PGK1, ALDOB, ENO1, GAPDH, IER3, HK1	93	51	19416	45.029728020240356	3.5461633629552125E-11	3.548329793934352E-11	3.4769877134213854E-11
GOTERM_BP_DIRECT	GO:0006094~gluconeogenesis	8	8.60215053763441	2.292081165500025E-9	PFKFB1, TPI1, GPD1, PGK1, ALDOB, ENO1, PCK1, FBP1	93	47	19416	35.536032944406315	2.1660143826318645E-6	1.01778630068432E-6	9.97322872416593E-7
GOTERM_BP_DIRECT	GO:0005975~carbohydrate metabolic process	11	11.827956989247312	3.231067621220063E-9	PYGB, ALDH2, B3GAT3, GPD1, ME1, SLC2A2, SLC2A3, CHST4, SLC2A5, FBP1, B4GALT4	93	155	19416	14.816233090530698	3.0533542590971408E-6	1.01778630068432E-6	9.97322872416593E-7
GOTERM_BP_DIRECT	GO:0061621~canonical glycolysis	6	6.451612903225806	4.101311551459412E-8	PKM, TPI1, PGK1, ENO1, PFKP, HK1	93	21	19416	59.64976958525346	3.8756643845783145E-5	9.689348540322861E-6	9.494536241628539E-6
GOTERM_BP_DIRECT	GO:0071456~cellular response to hypoxia	9	9.67741935483871	3.7244630238297156E-7	ERO1A, EGLN3, CITED2, STC2, PGK1, STC1, PCK1, HIF1A, VEGFA	93	142	19416	13.23216719672876	3.5189988997286203E-4	7.039235115038163E-5	6.897705520132633E-5
GOTERM_BP_DIRECT	GO:0001666~response to hypoxia	9	9.67741935483871	2.0596062687199153E-6	EGLN3, CITED2, DDIT4, SLC2A1, PLOD2, PLOD1, ANGPTL4, HIF1A, VEGFA	93	178	19416	10.555998550199348	0.0019444370564671853	3.2438798732338666E-4	3.1786590080577364E-4
Category	Term	Count	%	PValue	Genes	List Total	Pop Hits	Pop Total	Fold Enrichment	Bonferroni	Benjamini	FDR
GOTERM_CC_DIRECT	GO:0070062~extracellular exosome	35	37.634408602150536	3.9711361040156525E-11	PYGB, SLC2A1, SLC5A12, PLOD2, SLC2A3, PYGL, ENO1, PLOD1, TXN, SLC2A5, LDHB, PPP2R1B, ALDH2, CAPN5, PGK1, QSOX1, GFUS, PCK1, TPI1, B3GAT3, MIF, ALDH1A3, PKM, GPD1, CDK1, SDC1, TGFBI, ALDOB, AGRN, PAM, FBP1, GAPDH, CD44, PFKP, DSC2	93	2242	20666	3.469012882123296	7.505444266087125E-9	7.505447236589584E-9	7.108333626188018E-9
GOTERM_CC_DIRECT	GO:0005829~cytosol	48	51.61290322580645	7.460774702268893E-7	PFKFB1, PFKFB3, ADH1C, CITED2, ADH1B, ADH1A, SLC2A1, PYGL, HMMR, ENO1, TXN, ADH7, HIF1A, ACACB, AURKA, HK1, LDHB, ADH4, PPP2R1B, ME1, PGK1, BPNT1, GFUS, PCK1, IER3, EGLN3, GCKR, TPI1, HOMER1, MIF, PGM2L1, ALDH1A3, GALE, GCLC, PKM, ELF3, PSMC4, HKDC1, GPD1, DDIT4, RRAGD, CDK1, ALDOB, FBP1, GAPDH, CD44, PFKP, GNE	93	5576	20666	1.9128985976766788	1.4099875321993416E-4	7.050432093644104E-5	6.677393358530659E-5
GOTERM_CC_DIRECT	GO:0062023~collagen-containing extracellular matrix	10	10.75268817204301	6.168659974520674E-5	VCAN, PKM, COL5A1, GPC3, PLOD2, TGFBI, PLOD1, ANGPTL4, AGRN, DCN	93	391	20666	5.683249456865496	0.011591422720313549	0.0038862557839480245	0.003680633784797335
GOTERM_CC_DIRECT	GO:0005796~Golgi lumen	6	6.451612903225806	1.1647004053323917E-4	ERO1A, VCAN, GPC3, SDC1, AGRN, DCN	93	107	20666	12.460657220379861	0.02177357728877638	0.005503209415195551	0.005212034313862453
GOTERM_CC_DIRECT	GO:0005615~extracellular space	21	22.58064516129032	3.906376716099913E-4	ERO1A, TPI1, IGFBP3, STC1, TGFA, PLOD2, ENO1, PLOD1, MIF, MERTK, DCN, EGFR, VEGFA, VCAN, COL5A1, STC2, PGK1, TFF3, QSOX1, TGFBI, ANGPTL4	93	1986	20666	2.3497060065620636	0.07118429904532775	0.01476610398685767	0.013984828643637688
GOTERM_CC_DIRECT	GO:0005788~endoplasmic reticulum lumen	8	8.60215053763441	4.892037188896469E-4	ERO1A, VCAN, COL5A1, P4HA1, STC2, IGFBP3, GPC3, QSOX1	93	312	20666	5.697821891370279	0.08833449408557048	0.015409917145023879	0.014594577613541134
Category	Term	Count	%	PValue	Genes	List Total	Pop Hits	Pop Total	Fold Enrichment	Bonferroni	Benjamini	FDR
GOTERM_MF_DIRECT	GO:0051287~NAD binding	7	7.526881720430108	2.1112384491911265E-8	LDHB, ADH4, ALDH2, GPD1, ME1, ADH7, GAPDH	93	37	19208	39.07468759081662	7.325970666327564E-6	7.325997418693209E-6	7.0726488047902735E-6
GOTERM_MF_DIRECT	GO:0005536~D-glucose binding	4	4.301075268817205	4.640647928103379E-5	HKDC1, SLC2A3, PYGL, HK1	93	15	19208	55.07670250896058	0.015974455062940596	0.0032206096621037452	0.003109234111829264
GOTERM_MF_DIRECT	GO:0070095~fructose-6-phosphate binding	3	3.225806451612903	2.2480831322437922E-4	PFKFB1, GCKR, PFKP	93	5	19208	123.92258064516129	0.07505153310003887	0.009751060586107448	0.009413848116270879
GOTERM_MF_DIRECT	GO:0016491~oxidoreductase activity	7	7.526881720430108	6.785995463341445E-4	ERO1A, ALDH1A3, ADH4, ADH1C, ADH1B, GFUS, ADH7	93	221	19208	6.5419160219919235	0.2098669855958114	0.023547404257794814	0.02273308480219384
GOTERM_MF_DIRECT	GO:0005524~ATP binding	18	19.35483870967742	9.606419731058442E-4	PFKFB1, PFKFB3, PYGL, MERTK, ACACB, EGFR, AURKA, HK1, GCLC, PKM, PSMC4, HKDC1, PGK1, CDK1, KIF20A, MET, PFKP, GNE	93	1544	19208	2.4078221627945844	0.28359023540974615	0.030303887697066177	0.029255914635496164
GOTERM_MF_DIRECT	GO:0019900~kinase binding	5	5.376344086021505	0.001464118022623432	PFKFB1, LDHB, GCKR, SLC2A1, EGFR	93	102	19208	10.124393843558929	0.3985556334834297	0.042337412820860905	0.040873294798237474
Category	Term	Count	%	PValue	Genes	List Total	Pop Hits	Pop Total	Fold Enrichment	Bonferroni	Benjamini	FDR
KEGG_PATHWAY	hsa00010:Glycolysis / Gluconeogenesis	18	19.35483870967742	3.29237743209801E-21	TPI1, ADH1C, ADH1B, ADH1A, ENO1, ADH7, HK1, LDHB, ADH4, PKM, ALDH2, HKDC1, PGK1, ALDOB, PCK1, GAPDH, FBP1, PFKP	78	67	8865	30.53386911595867	5.662889183208578E-19	5.662889183208578E-19	4.938566148147015E-19
KEGG_PATHWAY	hsa00620:Pyruvate metabolism	11	11.827956989247312	5.3523760177381664E-12	LDHB, ADH4, PKM, ALDH2, ADH1C, ADH1B, ADH1A, ME1, PCK1, ADH7, ACACB	78	47	8865	26.599836333878887	9.206102546954753E-10	3.872557511807671E-10	3.377230388204364E-10
KEGG_PATHWAY	hsa04066:HIF-1 signaling pathway	14	15.053763440860216	6.754460776408728E-12	EGLN3, PFKFB3, SLC2A1, ENO1, HIF1A, EGFR, HK1, VEGFA, LDHB, HKDC1, PGK1, ALDOB, GAPDH, PFKP	78	109	8865	14.597741707833451	1.1617715678369223E-9	3.872557511807671E-10	3.377230388204364E-10
KEGG_PATHWAY	hsa01100:Metabolic pathways	39	41.935483870967744	1.656571817062368E-10	PYGB, PFKFB1, PFKFB3, ADH1C, ADH1B, ADH1A, PLOD2, PYGL, ENO1, PLOD1, ADH7, ACACB, HK1, LDHB, ADH4, ALDH2, ME1, PGK1, BPNT1, GFUS, PCK1, TPI1, B3GAT3, SRD5A3, MIF, PGM2L1, ALDH1A3, GALE, GCLC, PKM, P4HA1, HKDC1, B3GNT3, ALDOB, FBP1, GAPDH, PFKP, B4GALT4, GNE	78	1564	8865	2.834079283887468	2.8493030157505927E-8	7.123258813368183E-9	6.21214431398388E-9
KEGG_PATHWAY	hsa00051:Fructose and mannose metabolism	9	9.67741935483871	3.3814125262801E-10	PFKFB1, PFKFB3, TPI1, HKDC1, ALDOB, GFUS, FBP1, PFKP, HK1	78	34	8865	30.08484162895928	5.816030068661604E-8	1.1589347459900875E-8	1.0106989063867042E-8
KEGG_PATHWAY	hsa05230:Central carbon metabolism in cancer	11	11.827956989247312	4.042795625546817E-10	LDHB, PKM, HKDC1, SLC2A1, SLC2A2, HIF1A, SLC16A3, MET, EGFR, PFKP, HK1	78	71	8865	17.60834236186349	6.953609044124676E-8	1.1589347459900875E-8	1.0106989063867042E-8
